# Supplementary material for: Structures and characterization of m-nisoldipine polymorphs
Source: Royal Society of Chemistry journal article supplement (doi:10.1039/c2ce06359j), 2012-01-01
Supplement: c2ce06359j.pdf [file c2ce06359j.pdf]

## Electronic Supplementary Information

# Structures and characterizations of *m*-nisoldipine polymorphs

Caiqin Yang,<sup>†</sup> Zhenwei Zhang,<sup>‡</sup> Yanli Zeng,<sup>§</sup> Jing Wang,<sup>\*†</sup>

Yongli Wang,<sup>†</sup> Baoqing Ma<sup>\*⊥</sup>

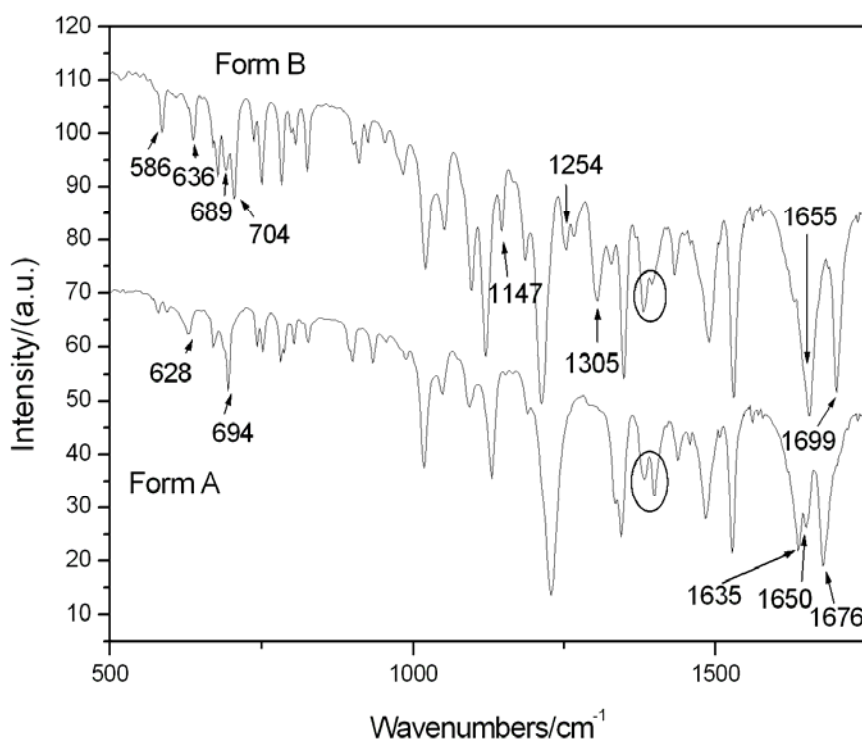

**Fig. S1** FT-IR spectra of polymorphs A and B

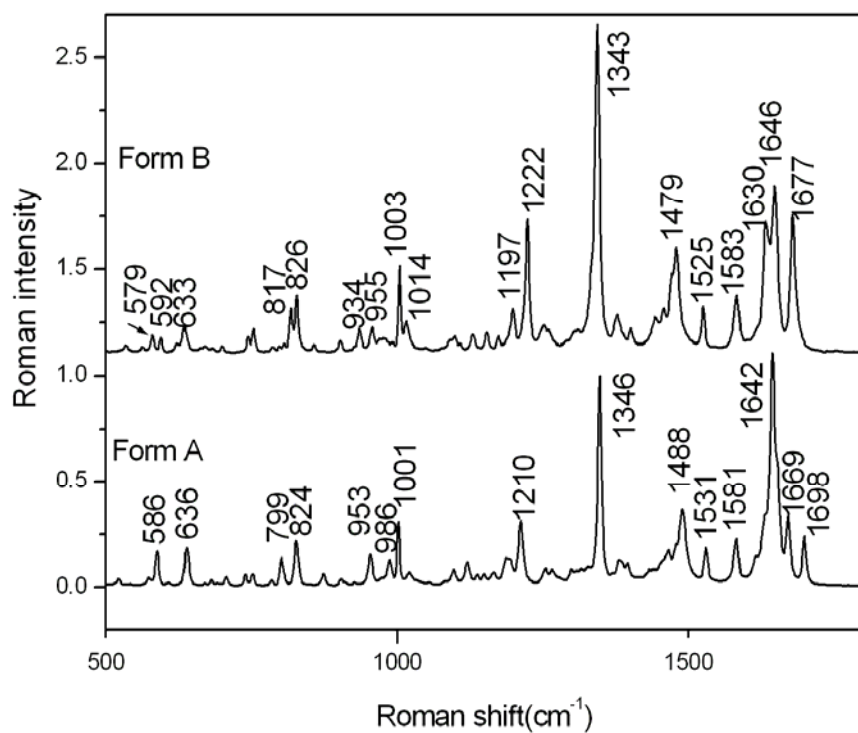

**Fig. S2 Raman spectra of polymorphs A and B**

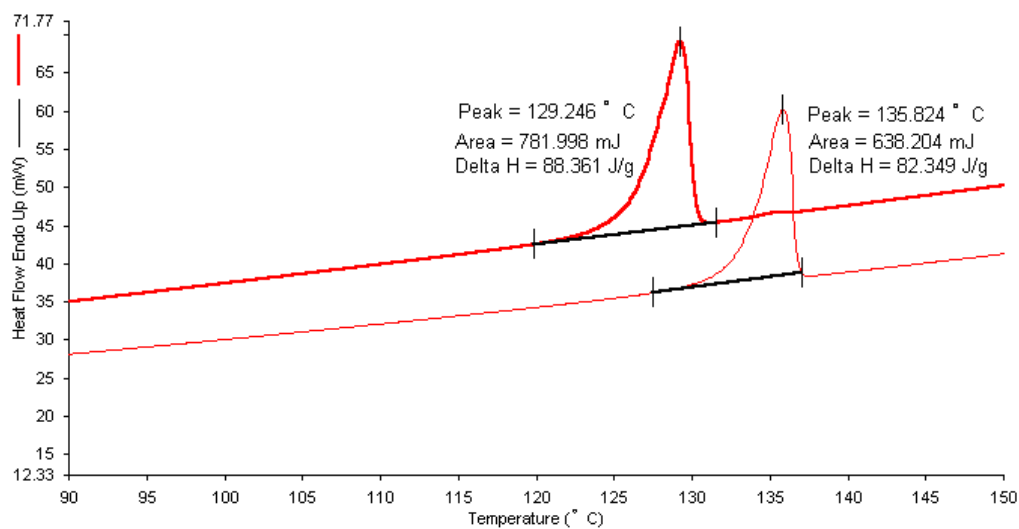

**Fig. S3 DSC curves of polymorphs A and B**
